# Supplementary material for: A Highly Sensitive XNA-Based RT-qPCR Assay for the Identification of ALK, RET, and ROS1 Fusions in Lung Cancer
Source: MDPI journal article supplement (doi:10.3390/diagnostics14050488), 2024-02-24
Supplement: s1 [file s1]

## **Supplementary**

**A highly sensitive XNA-based RT-qPCR assay for the identification of ALK, RET, and ROS1 fusions in lung cancer.**

Bongyong Lee\*, Andrew Chern, Andrew Y. Fu, Aiguo Zhang and Michael Y. Sha\*

DiaCarta Inc, 4385 Hopyard Rd., Suite 100, Pleasanton, CA 94588

**\*Corresponding author:** Michael Y. Sha: [msha@diacarta.com](mailto:msha@diacarta.com); Bongyong Lee: [blee@diacarta.com](mailto:blee@diacarta.com)

## **Supplementary Table and Figure Legends**

**Table S1. Amsbio FFPE sample information**

**Table S2. Sequence information of synthetic fusion and wild type templates**

**Table S3. The effect of XNA on fusion detection**

**Figure S1. Schematic of Qfusion™ ALK, RET, or ROS1 fusion detection assay targets.**

**Figure S2. Schematic of RT-qPCR workflow for Qfusion™ ALK, RET, or ROS1 fusion detection assay.**

**Figure S3. XNA blocker principal and PCR cycle**

XNA binds tightly to wild-type sequences with a perfect match at 70°C, effectively blocking DNA polymerase during the elongation step at 64°C. Moreover, XNA can bind to fusion sequences with imperfect matches, allowing DNA polymerase to displace XNA and amplify the target sequences.

**Figure S4. Confirmation of fusion genes by Sanger sequencing.**

Red arrow indicates the breaking point.

**Table S1.** Amsbio FFPE sample information

| Sample ID | Catalog # | Patient ID | Pathology Diagnosis     | Anatomical Site | Gender | Tissue Specification | Histology Grade | TNM Stage (T) | TNM Stage (N) | TNM Stage (M) | TNM Stage |
|-----------|-----------|------------|-------------------------|-----------------|--------|----------------------|-----------------|---------------|---------------|---------------|-----------|
| 190431    | AMS-28011 | AMS001     | Adenocarcinoma          | Lung            | Male   | Tumor                | G2              | T2b           | Nx            | Mx            | IIA       |
| 190432    | AMS-28011 | AMS002     | Large Cell Carcinoma    | Lung            | Male   | Tumor                | G2              | T2b           | Nx            | Mx            | IIA       |
| 190433    | AMS-28011 | AMS003     | Adenocarcinoma          | Lung            | Female | Tumor                | G2              | T3            | Nx            | Mx            | IIB       |
| 190434    | AMS-28011 | AMS004     | Adenocarcinoma          | Lung            | Male   | Tumor                | G3              | T3            | Nx            | Mx            | IIB       |
| 190435    | AMS-28011 | AMS005     | Adenocarcinoma          | Lung            | Male   | Tumor                | G2              | T2a           | Nx            | Mx            | IB        |
| 190436    | AMS-28011 | AMS006     | Adenocarcinoma          | Lung            | Female | Tumor                | G3              | T2b           | Nx            | Mx            | IIA       |
| 190437    | AMS-28011 | AMS007     | Large Cell Carcinoma    | Lung            | Male   | Tumor                | G2              | T2b           | Nx            | Mx            | IIA       |
| 190438    | AMS-28011 | AMS008     | Adenocarcinoma          | Lung            | Female | Tumor                | G3              | T3            | Nx            | Mx            | IIB       |
| 190439    | AMS-28011 | AMS009     | Adenocarcinoma          | Lung            | Female | Tumor                | G2              | T2a           | Nx            | Mx            | IB        |
| 190222    | AMS-28011 | AMS010     | Adenocarcinoma          | Lung            | Male   | Tumor                | G2              | T2b           | Nx            | Mx            | IIA       |
| 191573    | AMS-28011 | AMS011     | Adenocarcinoma          | Lung            | Male   | Tumor                | G2              | T2b           | Nx            | Mx            | IIA       |
| 191574    | AMS-28011 | AMS012     | Adenocarcinoma          | Lung            | Male   | Tumor                | G2              | T2b           | Nx            | Mx            | IIA       |
| 191575    | AMS-28011 | AMS013     | Adenocarcinoma          | Lung            | Female | Tumor                | G2              | T2a           | Nx            | Mx            | IB        |
| 191576    | AMS-28011 | AMS014     | Large Cell Carcinoma    | Lung            | Male   | Tumor                | G3              | T2b           | Nx            | Mx            | IIA       |
| 191577    | AMS-28011 | AMS015     | Large Cell Carcinoma    | Lung            | Male   | Tumor                | G3              | T2b           | Nx            | Mx            | IIA       |
| 191578    | AMS-28011 | AMS016     | Adenocarcinoma          | Lung            | Male   | Tumor                | G2              | T2a           | Nx            | Mx            | IB        |
| 191579    | AMS-28011 | AMS017     | Adenocarcinoma          | Lung            | Female | Tumor                | G2              | T2a           | Nx            | Mx            | IB        |
| 191580    | AMS-28011 | AMS018     | Large Cell Carcinoma    | Lung            | Male   | Tumor                | G3              | T3            | Nx            | Mx            | IIB       |
| 191581    | AMS-28011 | AMS019     | Adenocarcinoma          | Lung            | Female | Tumor                | G2              | T2a           | Nx            | Mx            | IB        |
| 191582    | AMS-28011 | AMS020     | Adenocarcinoma          | Lung            | Male   | Tumor                | G3              | T2b           | Nx            | Mx            | IIA       |
| 191583    | AMS-28011 | AMS021     | Adenocarcinoma          | Lung            | Female | Tumor                | G2              | T2a           | Nx            | Mx            | IB        |
| 191584    | AMS-28011 | AMS022     | Adenocarcinoma          | Lung            | Male   | Tumor                | G2              | T1c           | Nx            | Mx            | IA3       |
| 191585    | AMS-28011 | AMS023     | Large Cell Carcinoma    | Lung            | Male   | Tumor                | G3              | T2b           | Nx            | Mx            | IIA       |
| 191586    | AMS-28011 | AMS024     | Large Cell Carcinoma    | Lung            | Male   | Tumor                | G2              | T2b           | Nx            | Mx            | IIA       |
| 191587    | AMS-28011 | AMS025     | Adenocarcinoma          | Lung            | Male   | Tumor                | G3              | T3            | Nx            | Mx            | IIB       |
| 191588    | AMS-28011 | AMS026     | Adenocarcinoma          | Lung            | Female | Tumor                | G2              | T2b           | Nx            | Mx            | IIA       |
| 191589    | AMS-28011 | AMS027     | Adenocarcinoma          | Lung            | Male   | Tumor                | G2              | T1c           | Nx            | Mx            | IA3       |
| 191590    | AMS-28011 | AMS028     | Adenocarcinoma          | Lung            | Male   | Tumor                | G2              | T2a           | Nx            | Mx            | IB        |
| 191591    | AMS-28011 | AMS029     | Adenocarcinoma          | Lung            | Male   | Tumor                | G2              | T2a           | Nx            | Mx            | IB        |
| 191592    | AMS-28011 | AMS030     | Adenocarcinoma          | Lung            | Male   | Tumor                | G2              | T2a           | Nx            | Mx            | IB        |
| 191593    | AMS-28011 | AMS031     | Adenocarcinoma          | Lung            | Male   | Tumor                | G3              | T2b           | Nx            | Mx            | IIA       |
| 191594    | AMS-28011 | AMS032     | Adenocarcinoma          | Lung            | Male   | Tumor                | G2              | T1c           | Nx            | Mx            | IA3       |
| 191595    | AMS-28011 | AMS033     | Adenocarcinoma          | Lung            | Female | Tumor                | G2              | T2a           | Nx            | Mx            | IB        |
| 191596    | AMS-28011 | AMS034     | Large Cell Carcinoma    | Lung            | Male   | Tumor                | G3              | T3            | Nx            | Mx            | IIB       |
| 191597    | AMS-28011 | AMS035     | Squamous Cell Carcinoma | Lung            | Female | Tumor                | G2              | T2b           | Nx            | Mx            | IIA       |
| 191598    | AMS-28011 | AMS036     | Large Cell Carcinoma    | Lung            | Male   | Tumor                | G2              | T1c           | Nx            | Mx            | IA3       |
| 191599    | AMS-28011 | AMS037     | Large Cell Carcinoma    | Lung            | Male   | Tumor                | G2              | T2a           | Nx            | Mx            | IB        |
| 191600    | AMS-28011 | AMS038     | Large Cell Carcinoma    | Lung            | Female | Tumor                | G2              | T2a           | Nx            | Mx            | IB        |
| 191601    | AMS-28011 | AMS039     | Adenocarcinoma          | Lung            | Male   | Tumor                | G3              | T2b           | Nx            | Mx            | IIA       |
| 191602    | AMS-28011 | AMS040     | Adenocarcinoma          | Lung            | Male   | Tumor                | G2              | T2b           | Nx            | Mx            | IIA       |
| 191603    | AMS-28011 | AMS041     | Adenocarcinoma          | Lung            | Male   | Tumor                | G2              | T2a           | Nx            | Mx            | IB        |
| 191604    | AMS-28011 | AMS042     | Adenocarcinoma          | Lung            | Male   | Tumor                | G2              | T2b           | Nx            | Mx            | IIA       |
| 191605    | AMS-28011 | AMS043     | Adenocarcinoma          | Lung            | Male   | Tumor                | G3              | T2a           | Nx            | Mx            | IB        |
| 191606    | AMS-28011 | AMS044     | Adenocarcinoma          | Lung            | Female | Tumor                | G2              | T1c           | Nx            | Mx            | IA3       |
| 191607    | AMS-28011 | AMS045     | Adenocarcinoma          | Lung            | Male   | Tumor                | G2              | T2a           | Nx            | Mx            | IB        |
| 191608    | AMS-28011 | AMS046     | Adenocarcinoma          | Lung            | Male   | Tumor                | G3              | T3            | Nx            | Mx            | IIB       |
| 191609    | AMS-28011 | AMS047     | Adenocarcinoma          | Lung            | Male   | Tumor                | G2              | T2b           | Nx            | Mx            | IIA       |
| 191610    | AMS-28011 | AMS048     | Adenocarcinoma          | Lung            | Male   | Tumor                | G2              | T2a           | Nx            | Mx            | IB        |
| 191611    | AMS-28011 | AMS049     | Adenocarcinoma          | Lung            | Male   | Tumor                | G3              | T2b           | Nx            | Mx            | IIA       |
| 191612    | AMS-28011 | AMS050     | Adenocarcinoma          | Lung            | Male   | Tumor                | G2              | T2a           | Nx            | Mx            | IB        |
| 191613    | AMS-28011 | AMS051     | Adenocarcinoma          | Lung            | Female | Tumor                | G3              | T3            | Nx            | Mx            | IIB       |
| 191614    | AMS-28011 | AMS052     | Adenocarcinoma          | Lung            | Female | Tumor                | G2              | T1c           | Nx            | Mx            | IA3       |
| 191615    | AMS-28011 | AMS053     | Adenocarcinoma          | Lung            | Male   | Tumor                | G2              | T2b           | Nx            | Mx            | IIA       |
| 191616    | AMS-28011 | AMS054     | Adenocarcinoma          | Lung            | Female | Tumor                | G2              | T2a           | Nx            | Mx            | IB        |
| 191617    | AMS-28011 | AMS055     | Adenocarcinoma          | Lung            | Female | Tumor                | G2              | T2b           | Nx            | Mx            | IIA       |
|           | T8235152  | AMS056     | Adenocarcinoma          | Lung            |        | Tumor                |                 |               |               |               |           |
|           | HP-601    | AMS057     |                         | Lung            |        | Normal               |                 |               |               |               |           |



**Table S3.** The effect of XNA on fusion detection

| <b>EML4-ALK V1</b> | <b>50 copies</b> |       |
|--------------------|------------------|-------|
|                    | no XNA           | XNA   |
| <b>Cq Rep 1</b>    | 31.04            | 31.57 |
| <b>Cq Rep 2</b>    | 30.69            | 30.84 |
| <b>Cq Rep 3</b>    | 30.86            | 31.14 |
| <b>Cq Rep 4</b>    | 31.01            | 30.95 |
| <b>Cq Rep 5</b>    | 31.04            | 31.12 |
| <b>Cq Rep 6</b>    | 31.10            | 31.15 |
| <b>Cq Rep 7</b>    | 30.99            | 31.36 |
| <b>Cq Rep 8</b>    | 30.99            | 31.25 |
| <b>Cq Rep 9</b>    | 31.06            | 31.35 |
| <b>Cq Rep 10</b>   | 30.84            | 31.15 |
| <b>AVG</b>         | 30.96            | 31.19 |
| <b>SD</b>          | 0.13             | 0.21  |
| <b>Delta Cq</b>    |                  | 0.22  |

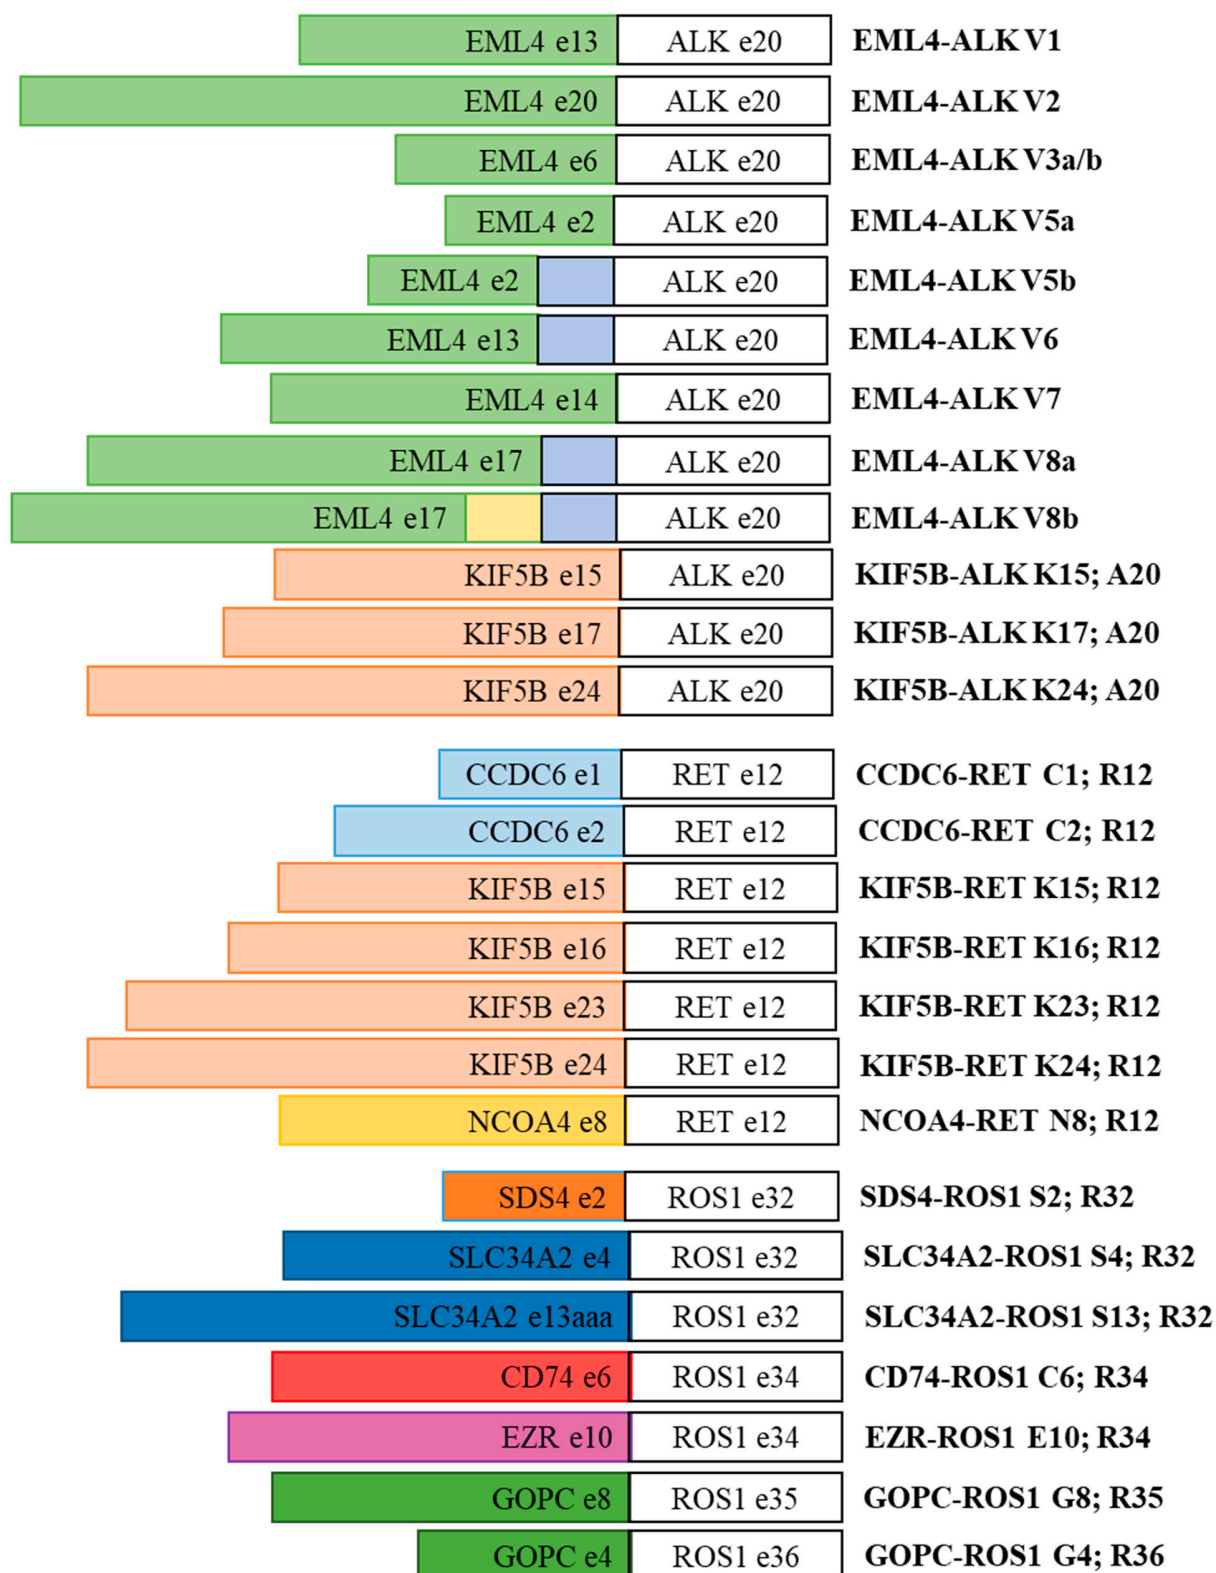

Figure S1. Schematic of Qfusion™ ALK, RET, or ROS1 fusion detection assay targets.

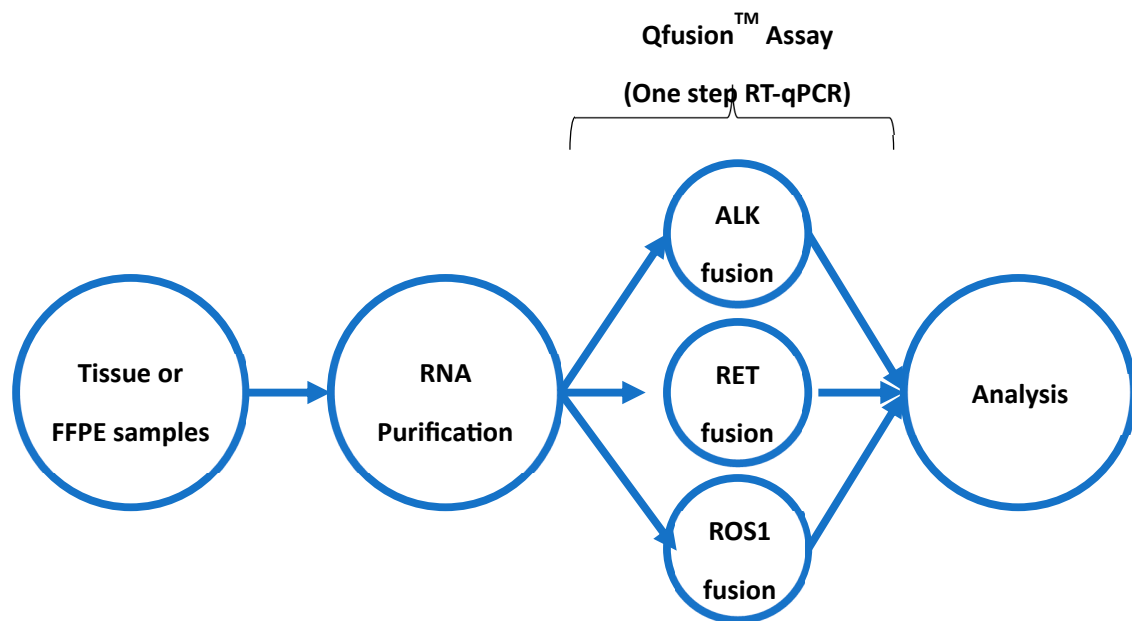

**Figure S2. Schematic of RT-qPCR workflow for Qfusion™ ALK, RET, or ROS1 fusion detection assay.**

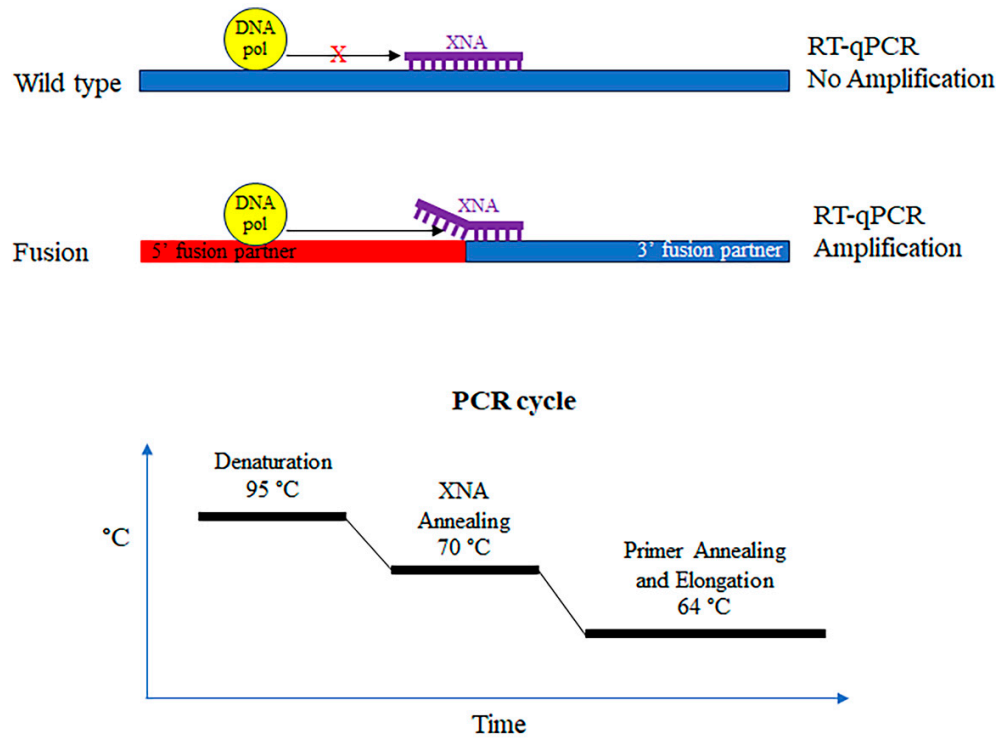

**Figure S3. XNA blocker principal and PCR cycle**

XNA binds tightly to wild-type sequences with a perfect match at 70°C, effectively blocking DNA polymerase during the elongation step at 64°C. Moreover, XNA can bind to fusion sequences with imperfect matches, allowing DNA polymerase to displace XNA and amplify the target sequences.



EML4-ALK V1

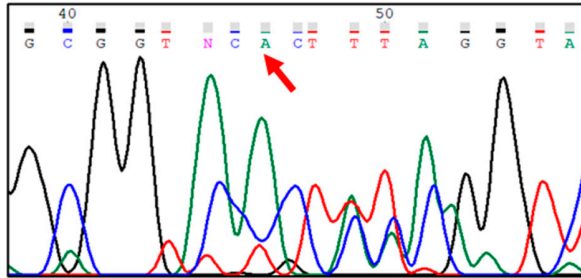

CCDC6-RET

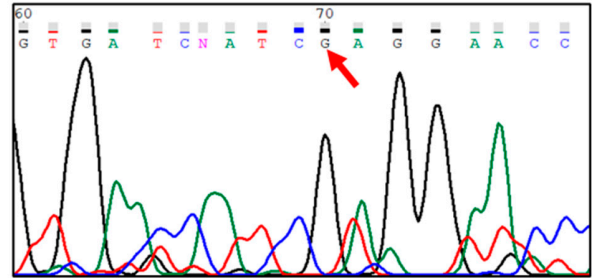

EML4-ALK V7

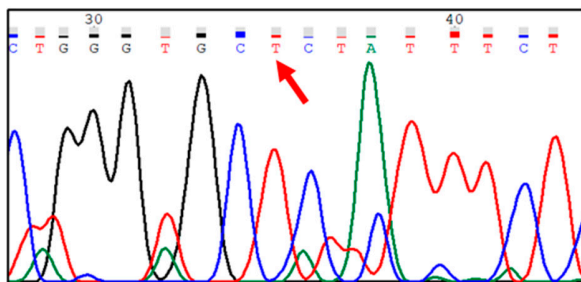

CD74-ROS1

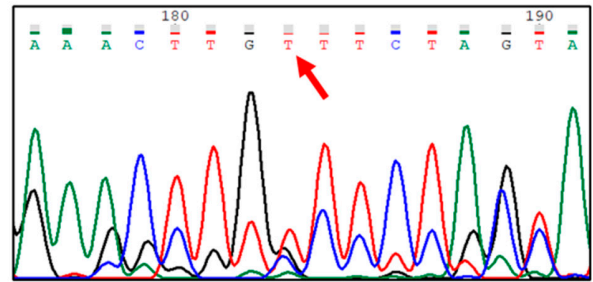

**Figure S4. Confirmation of fusion genes by Sanger sequencing.**  
Red arrow indicates the breaking point.
